# Supplementary material for: A three-dimensional porous metal–organic framework with the rutile topology constructed from triangular and distorted octahedral building blocks
Source: Royal Society of Chemistry journal article supplement (doi:10.1039/b501477h), 2005-01-01
Supplement: b501477h.pdf [file b501477h.pdf]

## Supporting Information

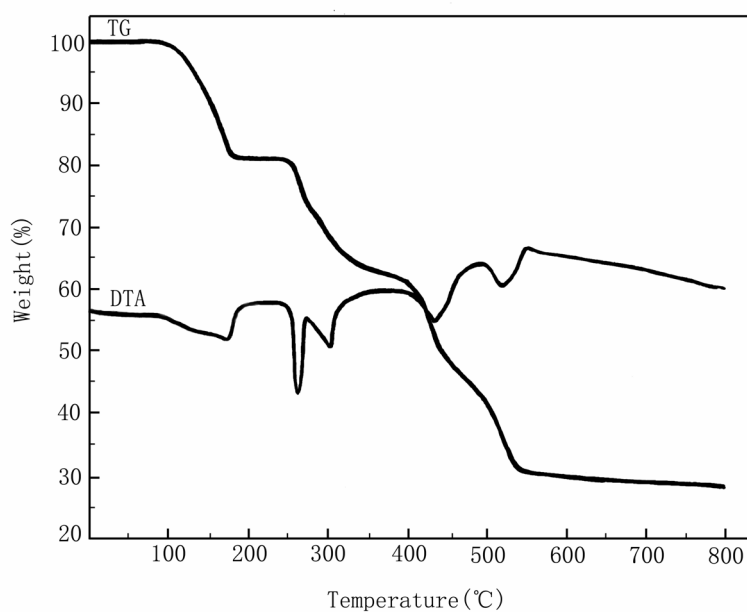

Fig. S1 TG-DTA curve of as-synthesized **1**. Heating rate: 10 deg sec<sup>-1</sup>, N<sub>2</sub> atmosphere. The first step weight loss of 18.86% between 110 °C and 170 °C, corresponds to the removal of the DMF molecules (calcd. 18.66%). The framework is stable up to 270 °C and starts to decompose at higher temperatures.

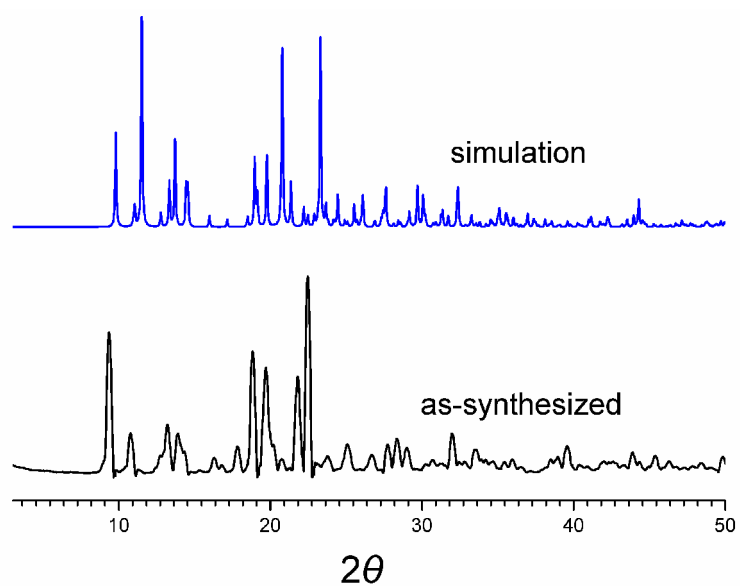

Fig. S2 XRPD patterns of a simulation based on the single-crystal data (blue) and as-synthesized samples (black).

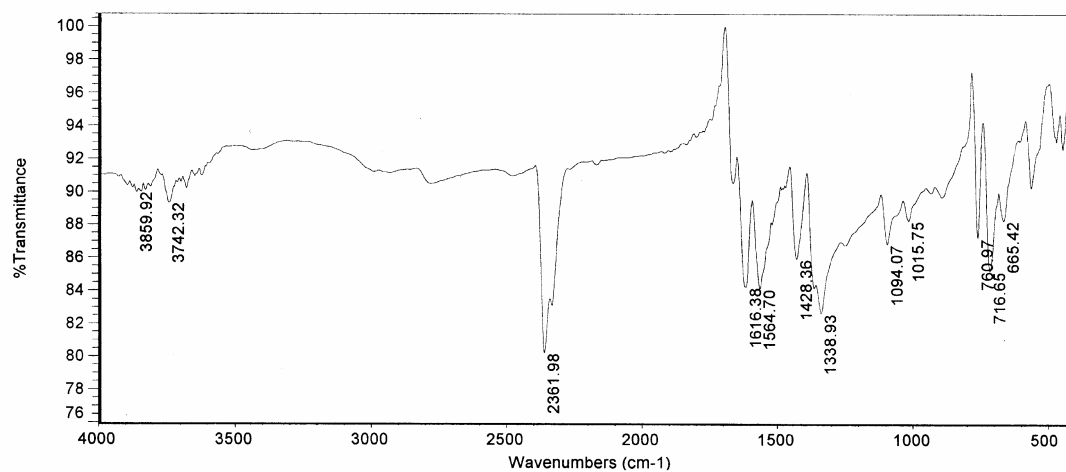

Fig. S3 FT-IR spectra of as-synthesized samples.

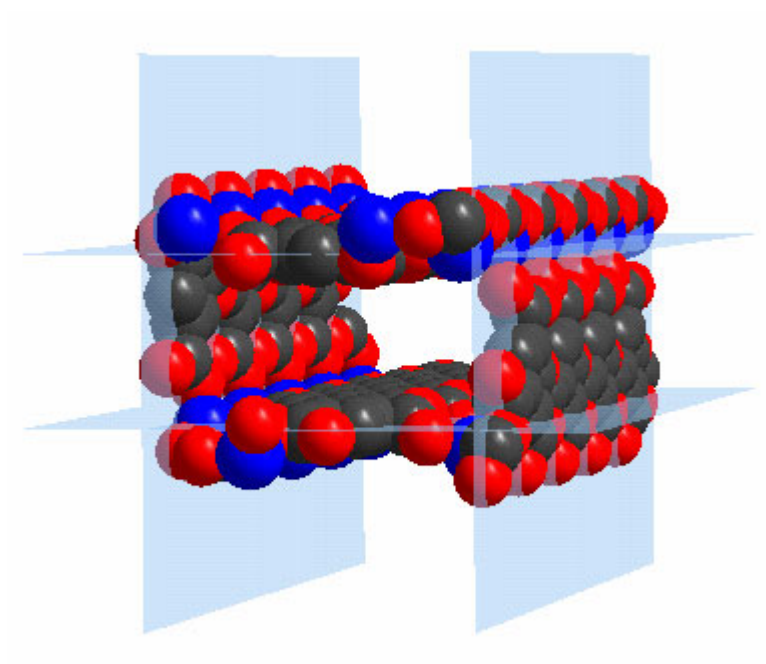

Fig. S4 Least-square planes through the walls of a single channel.

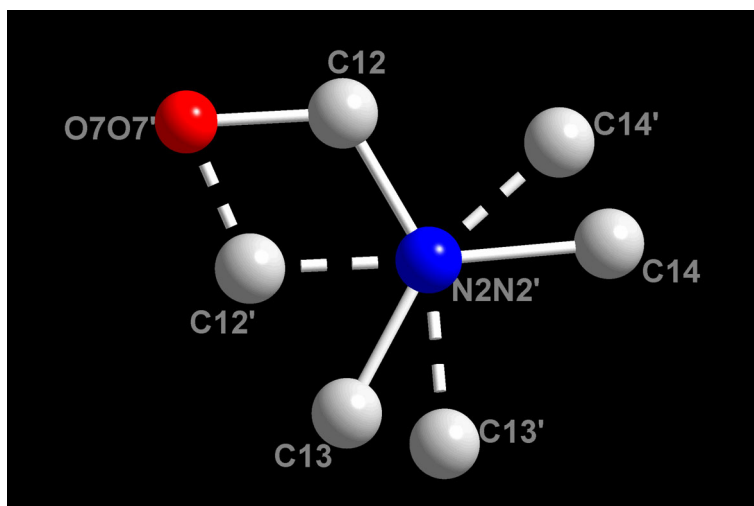

Fig. S5 Perspective view of the disordered DMF guest molecule. The occupancies of the molecule on two positions were refined and then fixed at 63.355%(solid bonds)–36.645%(dotted bonds).
